# Supplementary material
Source: PubMed Central journal article supplement (PMC3887944)
Supplement: molcell-36-5-410-4-supplementary.pdf [file molcell-36-5-410-4-supplementary.pdf]

Supplementary Table 1. Identified protein that showed differential expression in worms grown with CS

| Code No. | Gene name       | Protein identified                       | Accession No. | Mass (Da) | pI value | Changed -fold | Match % | MASCOT Score |
|----------|-----------------|------------------------------------------|---------------|-----------|----------|---------------|---------|--------------|
| 191      | <i>hsp-1</i>    | Molecular chaperone                      | CE09682       | 69965     | 5.44     | +1.51         | 41      | 157          |
| 279      | ZK829.4         | dehydrogenase                            | CE06652       | 59214     | 6.90     | -1.60         | 41      | 185          |
| 315      | <i>vha-12</i>   | Vacuolar H <sup>+</sup> ATPase V1 sector | CE04424       | 55001     | 5.34     | +1.51         | 29      | 12           |
| 337      | <i>tbb-1</i>    | Beta tubulin                             | CE16197       | 50662     | 4.79     | +2.11         | 31      | 80           |
| 340      | <i>eef-1A.1</i> | Translation elongation factor EF-1 alpha | CE01270       | 51092     | 9.07     | -2.37         | 26      | 71           |
| 395      | K02F2.2         | S-adenosyl homocysteine hydrolase        | CE17154       | 47905     | 5.85     | -1.58         | 43      | 155          |
| 405      | <i>sams-1</i>   | S-adenosyl methionine synthase           | CE08852       | 43840     | 6.02     | -2.54         | 34      | 101          |
| 410      | <i>pmt-2</i>    | SAM-dependent methyltransferase          | CE11068       | 49909     | 5.61     | -2.62         | 32      | 152          |
| 423      | <i>act-5</i>    | Actin and related protein                | CE16463       | 42131     | 5.44     | +1.54         | 26      | 69           |
| 454      | F13H8.7         | C-N hydrolase                            | CE02641       | 43398     | 5.92     | -1.51         | 32      | 91           |
| 457      | <i>acd-1</i>    | Acyl-CoA dehydrogenase                   | CE09015       | 47574     | 6.42     | -2.79         | 45      | 166          |
| 515      | R07H5.8         | Adenosine kinase                         | CE12564       | 37917     | 5.67     | -2.27         | 69      | 229          |
| 521      | <i>lec-5</i>    | Galectin                                 | CE29645       | 35529     | 7.74     | +2.38         | 34      | 103          |
| 552      | <i>rla-0</i>    | Ribosomal protein, large subunit         | CE09655       | 33867     | 6.27     | -2.53         | 40      | 96           |
| 564      | <i>rla-0</i>    | Ribosomal protein, large subunit         | CE09655       | 33867     | 6.27     | +1.73         | 38      | 85           |

| Code No. | Gene name     | Protein identified                                   | Accession No. | Mass (Da) | pI value | Changed -fold | Match % | Score |
|----------|---------------|------------------------------------------------------|---------------|-----------|----------|---------------|---------|-------|
| 574      | T14D7.1       | Alanine-glyoxylate aminotransferase                  | CE23985       | 44268     | 8.39     | +2.01         | 27      | 59    |
| 593      | <i>rack-1</i> | G protein beta subunit-like protein                  | CE06090       | 36150     | 6.44     | -1.65         | 62      | 162   |
| 606      | <i>ltd-1</i>  | Regulatory protein MLP and related LIM protein       | CE32687       | 84111     | 8.34     | ND            | 15      | 48    |
| 621      | <i>lec-1</i>  | Galectin                                             | CE16576       | 31790     | 6.12     | +2.46         | 77      | 253   |
| 635      | <i>nex-1</i>  | Annexin                                              | CE01431       | 35731     | 6.13     | +2.58         | 62      | 203   |
| 693      | <i>phb-1</i>  | Prohibitin                                           | CE26775       | 29970     | 6.93     | -1.46         | 56      | 145   |
| 697      | <i>ftt-2</i>  | Multifunctional chaperone                            | CE36489       | 34278     | 4.8      | +1.59         | 46      | 144   |
| 702      | <i>ech-6</i>  | Enol-CoA hydratase                                   | CE00318       | 31380     | 8.58     | -1.83         | 60      | 189   |
| 711      | F54H12.6      | Elongation factor 1 beta/delta chain                 | CE00548       | 22690     | 4.38     | -1.51         | 46      | 115   |
| 721      | <i>vha-8</i>  | Vacuolar H <sup>+</sup> -ATPase V1 sector, subunit E | CE19362       | 25742     | 6.78     | -1.64         | 64      | 178   |
| 981      | <i>lbp-6</i>  | Fatty acid-binding protein                           | CE14426       | 15631     | 6.77     | -1.56         | 60      | 123   |
| 1027     | Y22D7AL.10    | Mitochondria chaperonin                              | CE27242       | 11842     | 9.26     | -1.57         | 73      | 107   |

ND, not determined
